# Supplementary material for: N-(Acetamido)thiourea based simple neutral hydrogen-bonding receptors for anions
Source: Royal Society of Chemistry journal article supplement (doi:10.1039/b910255h), 2009-01-01

## ***N*-(Acetamido)thiourea Based Simple Neutral Hydrogen-Bonding Receptors for Anions**

Wen-Xia Liu,<sup>a</sup> Rui Yang,<sup>a,b</sup> Ai-Fang Li,<sup>a</sup> Zhao Li,<sup>a</sup> Yu-Feng Gao,<sup>a</sup> Xing-Xing Luo,<sup>a</sup> Yi-Bin Ruan,<sup>a</sup> and  
Yun-Bao Jiang<sup>a,\*</sup>

<sup>a</sup> Department of Chemistry, College of Chemistry and Chemical Engineering, and the MOE Key  
Laboratory of Analytical Sciences, Xiamen University, Xiamen 361005, China. <sup>b</sup> College of  
Chemistry and Chemical Engineering, Southwest University, Chongqing 400715, China  
Fax: (+86)592-218-5662; Tel: (+86)592-218-5662; E-mail: [ybjiang@xmu.edu.cn](mailto:ybjiang@xmu.edu.cn)

### **Electronic Supplementary Information (ESI)**

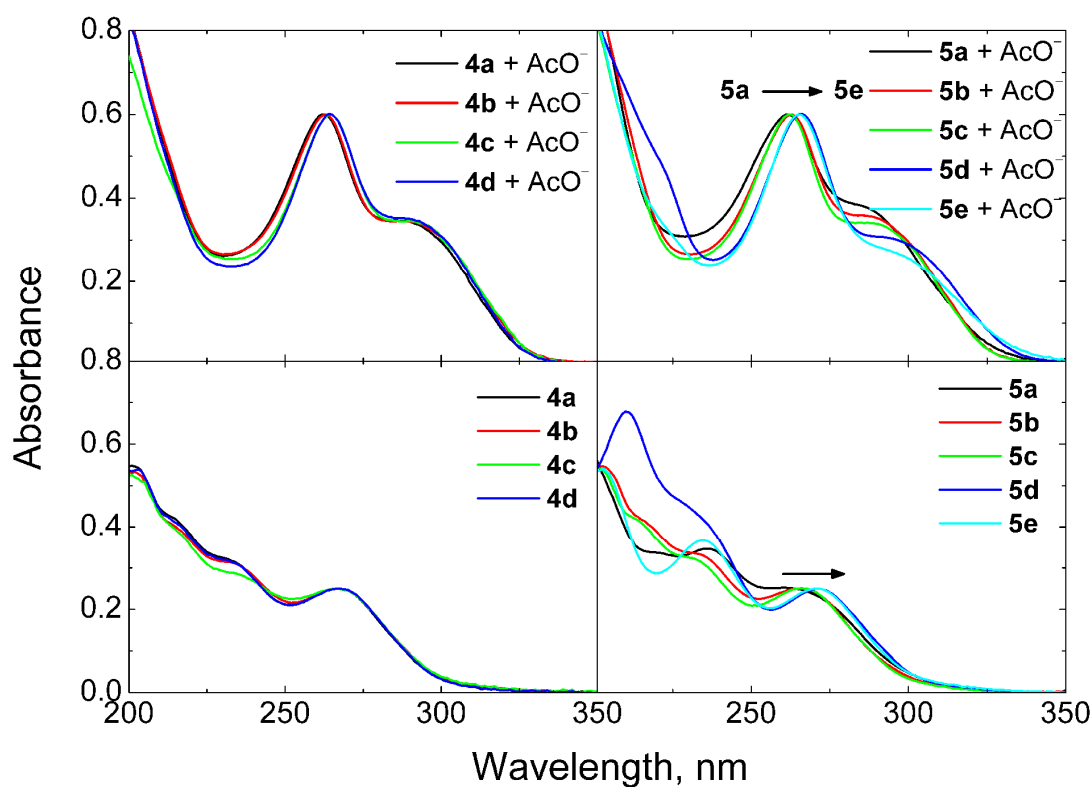

**Figure S1.** Absorption spectra of **4** and **5** and their AcO<sup>-</sup> complexes in acetonitrile

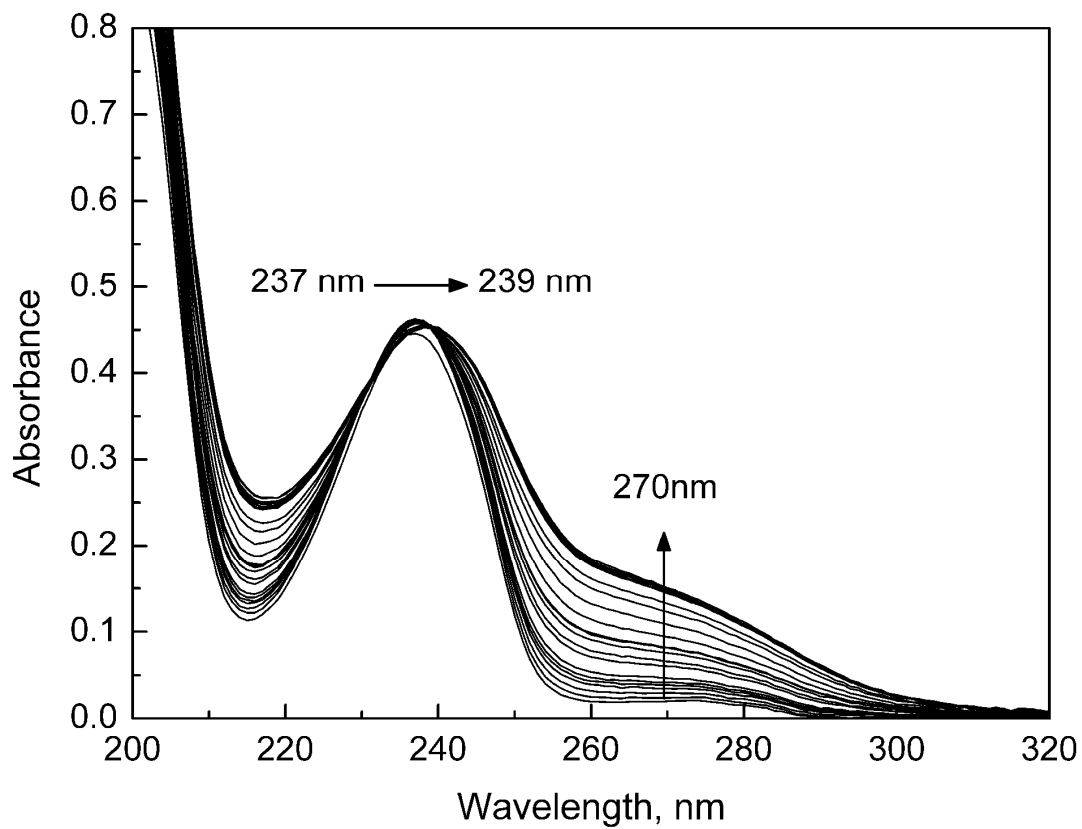

**Figure S2.** Absorption spectra of **7** in acetonitrile in the presence of  $F^-$  over 0 to  $5.0 \times 10^{-4} \text{ mol L}^{-1}$ .  $[7] = 1.0 \times 10^{-5} \text{ mol L}^{-1}$ .

# $^1\text{H}$ NMR and $^{13}\text{C}$ NMR spectra of 4b-4d (4a = 5c), 5a-5f, 6 and 7

## 2-Dodecanoyl-*N*-phenylhydrazinecarbothioamide (4b)

$^1\text{H}$  NMR (500 MHz,  $\text{DMSO-}d_6$ )

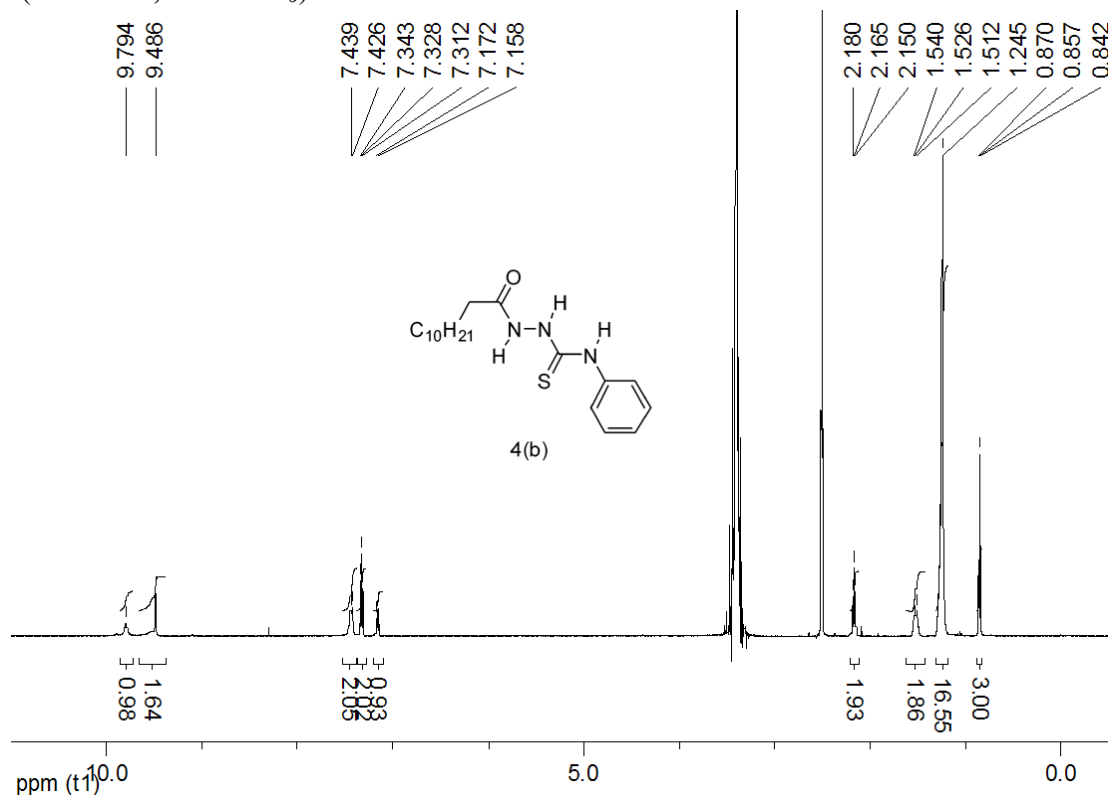

$^{13}\text{C}$  NMR (125 MHz,  $\text{DMSO-}d_6$ )

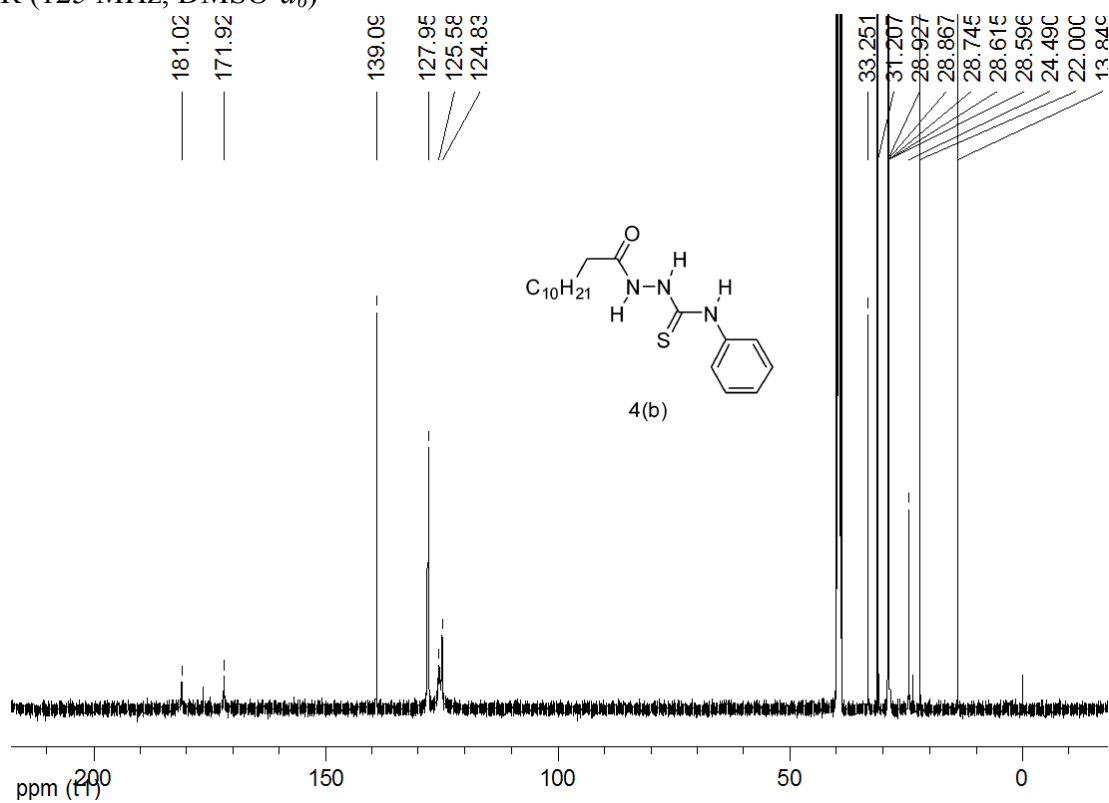

## 2-(2-(Dimethylamino)acetyl)-*N*-phenylhydrazinecarbothioamide (4c)

$^1\text{H}$  NMR (400 MHz,  $\text{DMSO-}d_6$ )

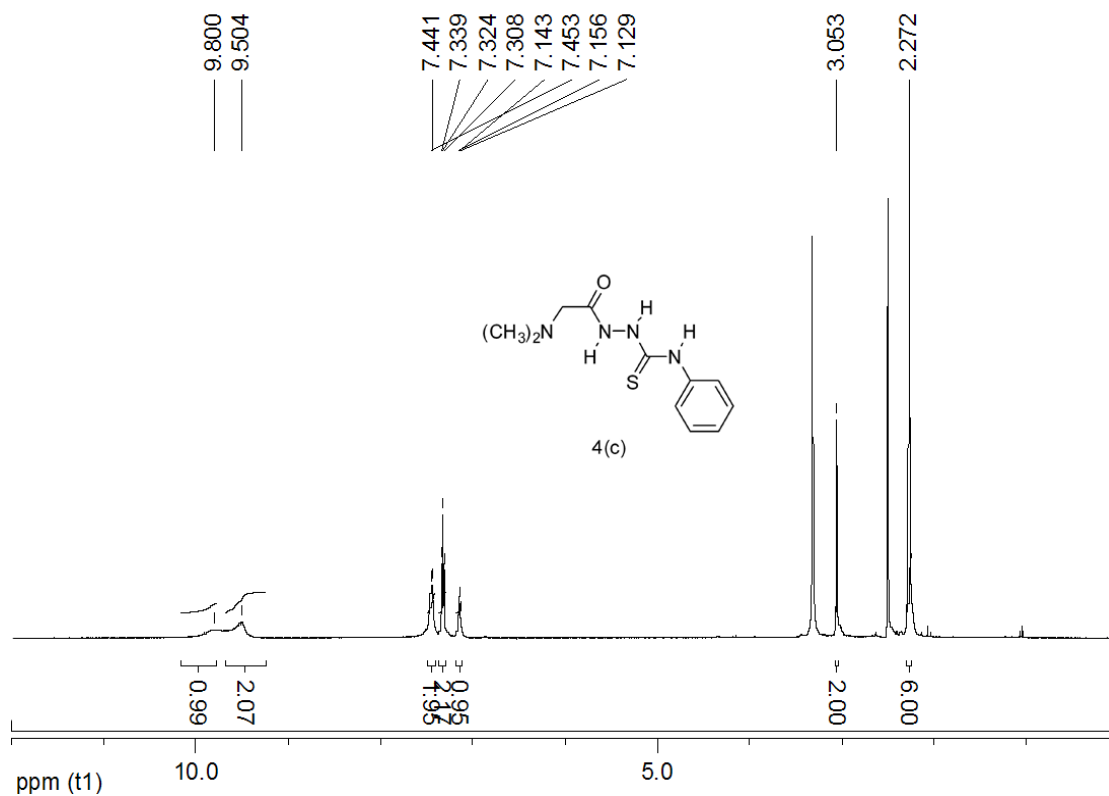

$^{13}\text{C}$  NMR (100 MHz,  $\text{DMSO-}d_6$ )

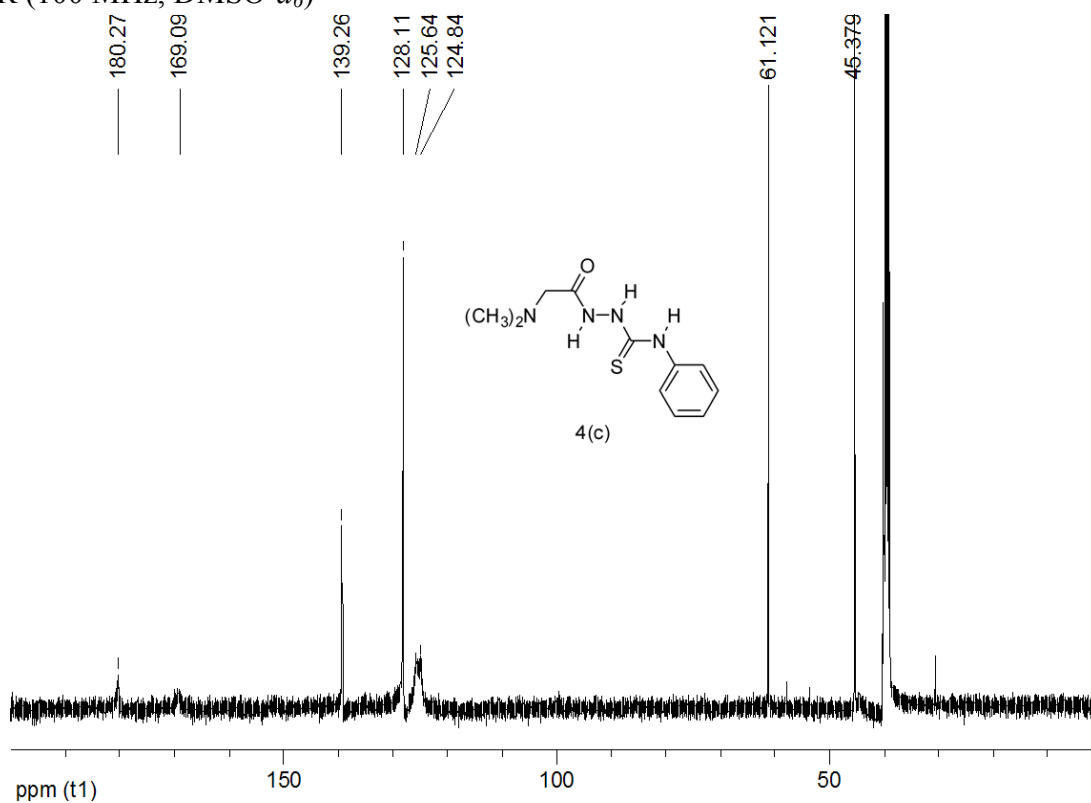

## 2-Methoxyacetyl-*N*-phenylhydrazinecarbothioamide (4d)

$^1\text{H}$  NMR (400 MHz,  $\text{DMSO-}d_6$ )

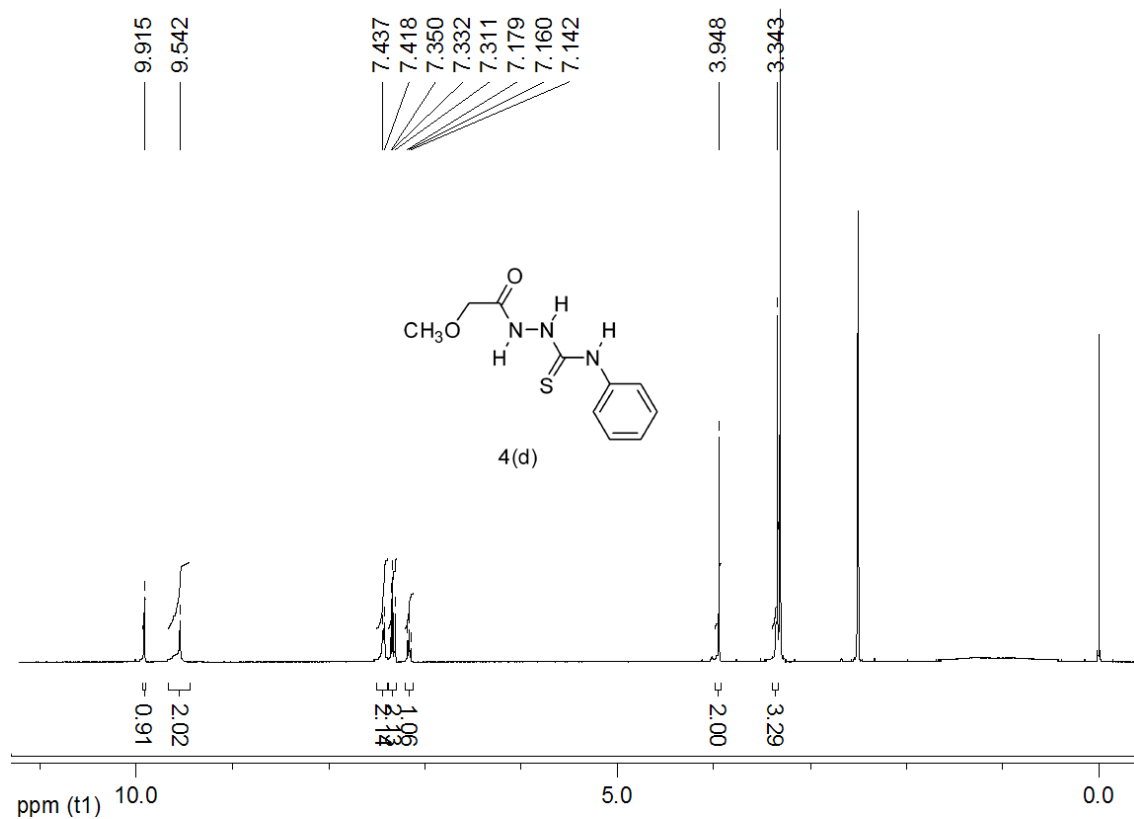

$^{13}\text{C}$  NMR (100 MHz,  $\text{DMSO-}d_6$ )

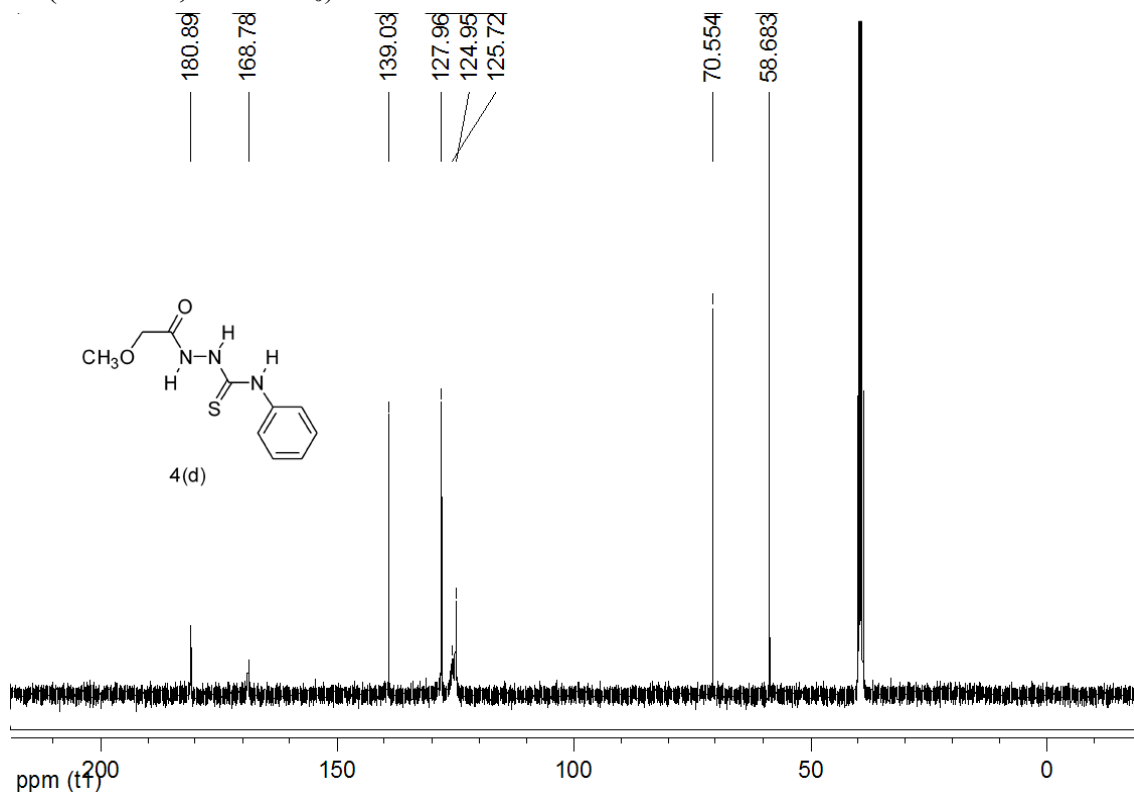

## 2-Acetyl-*N*-(4-methoxyphenyl)hydrazinecarbothioamide (5a)

$^1\text{H}$  NMR (400 MHz,  $\text{DMSO-}d_6$ )

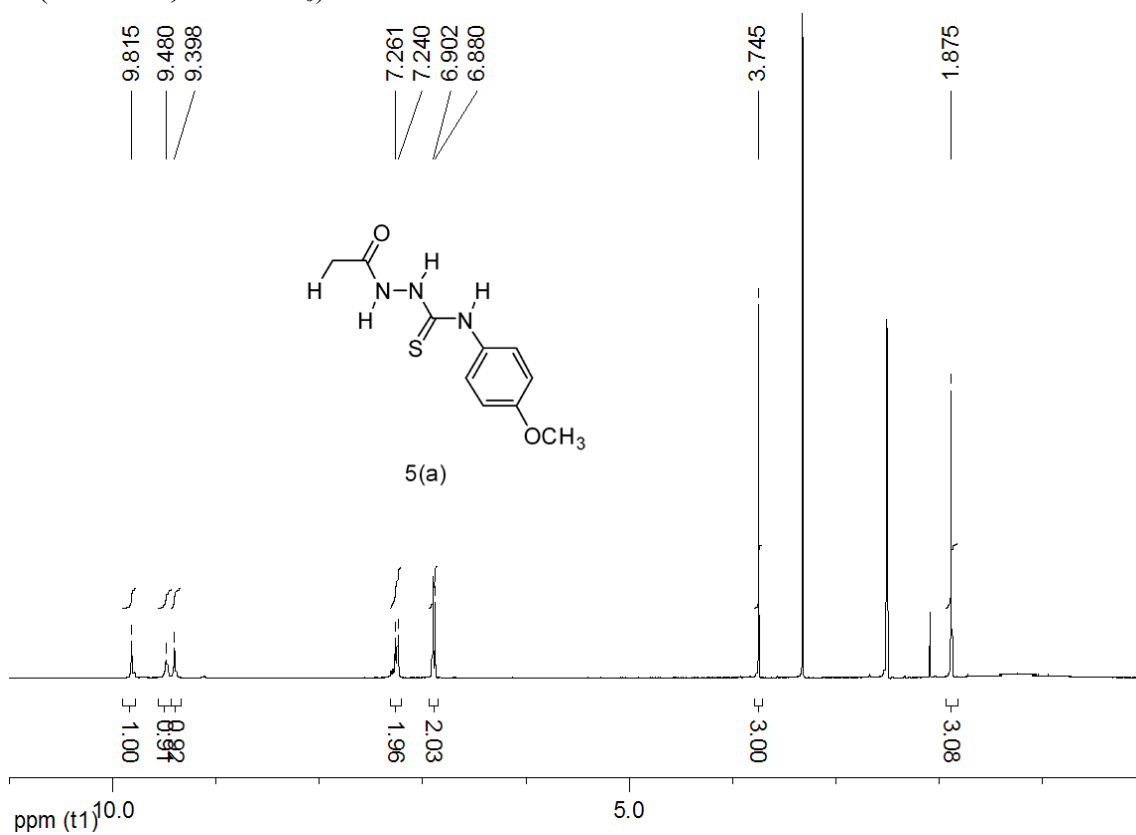

$^{13}\text{C}$  NMR (100 MHz,  $\text{DMSO-}d_6$ )

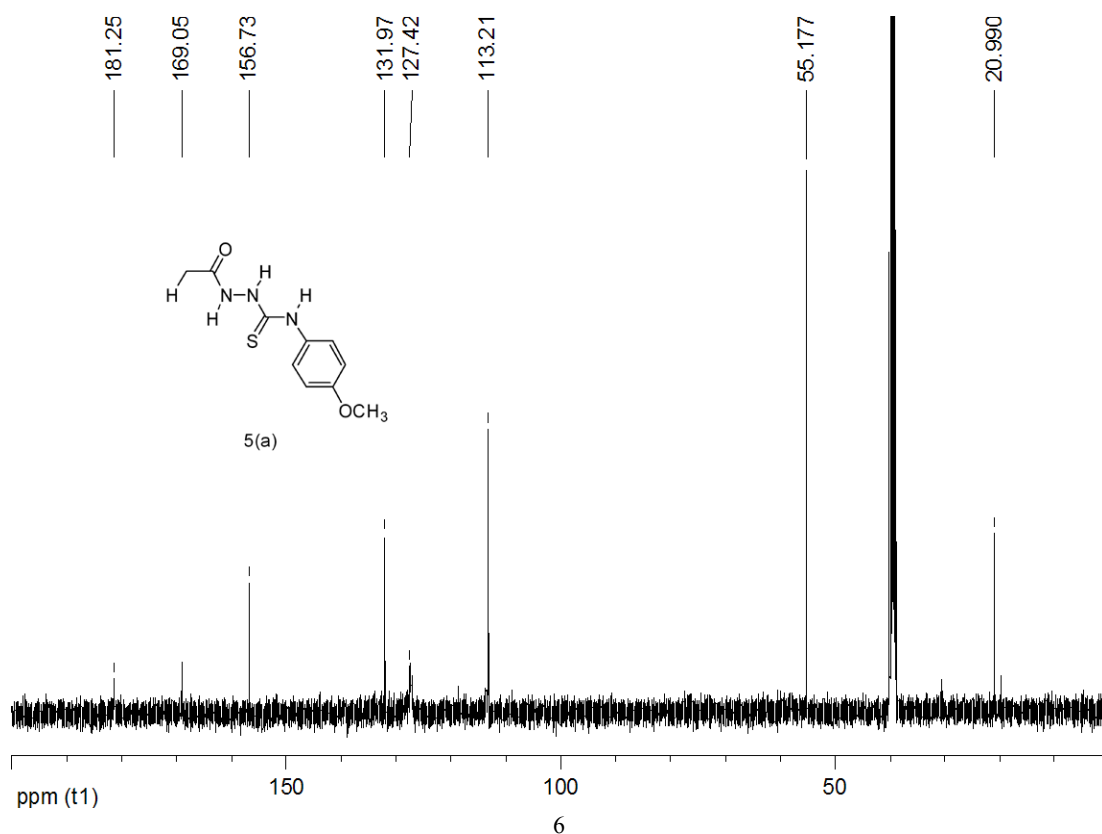

### 2-Acetyl-*N*-(*p*-tolyl)hydrazinecarbothioamide (5b)

$^1\text{H}$  NMR (400 MHz,  $\text{DMSO-}d_6$ )

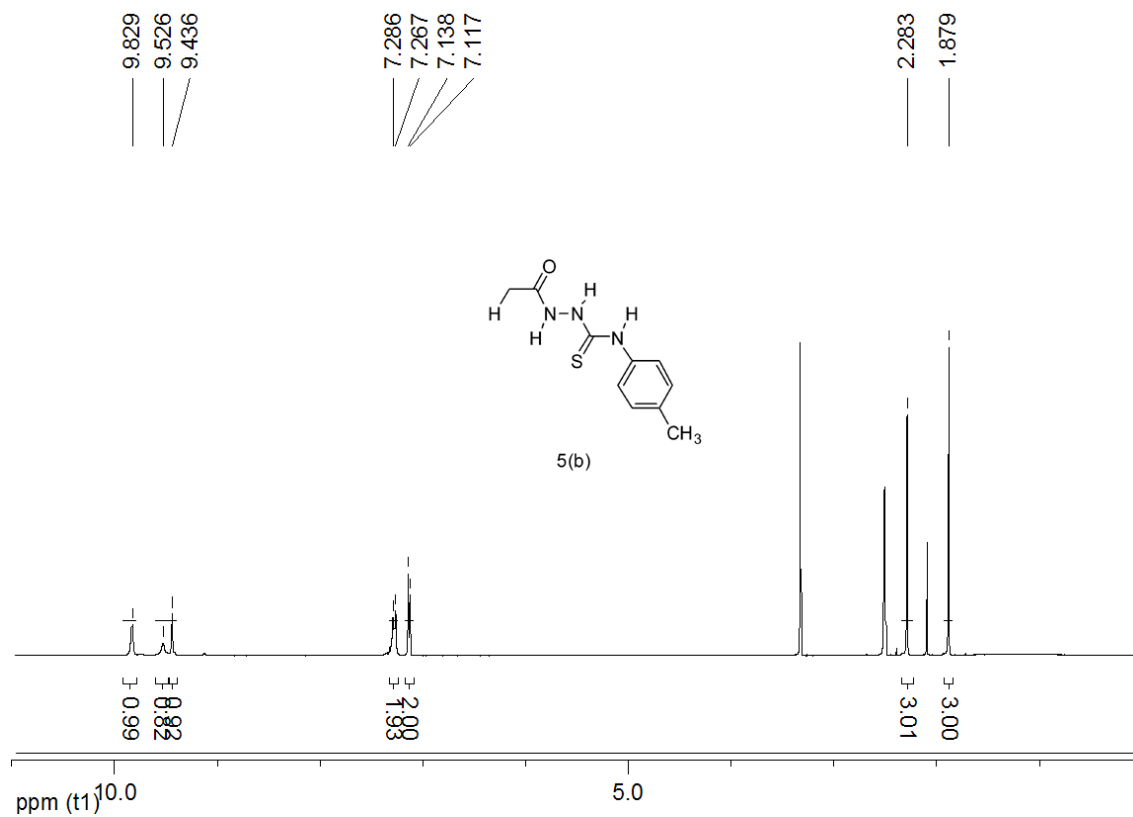

$^{13}\text{C}$  NMR (100 MHz,  $\text{DMSO-}d_6$ )

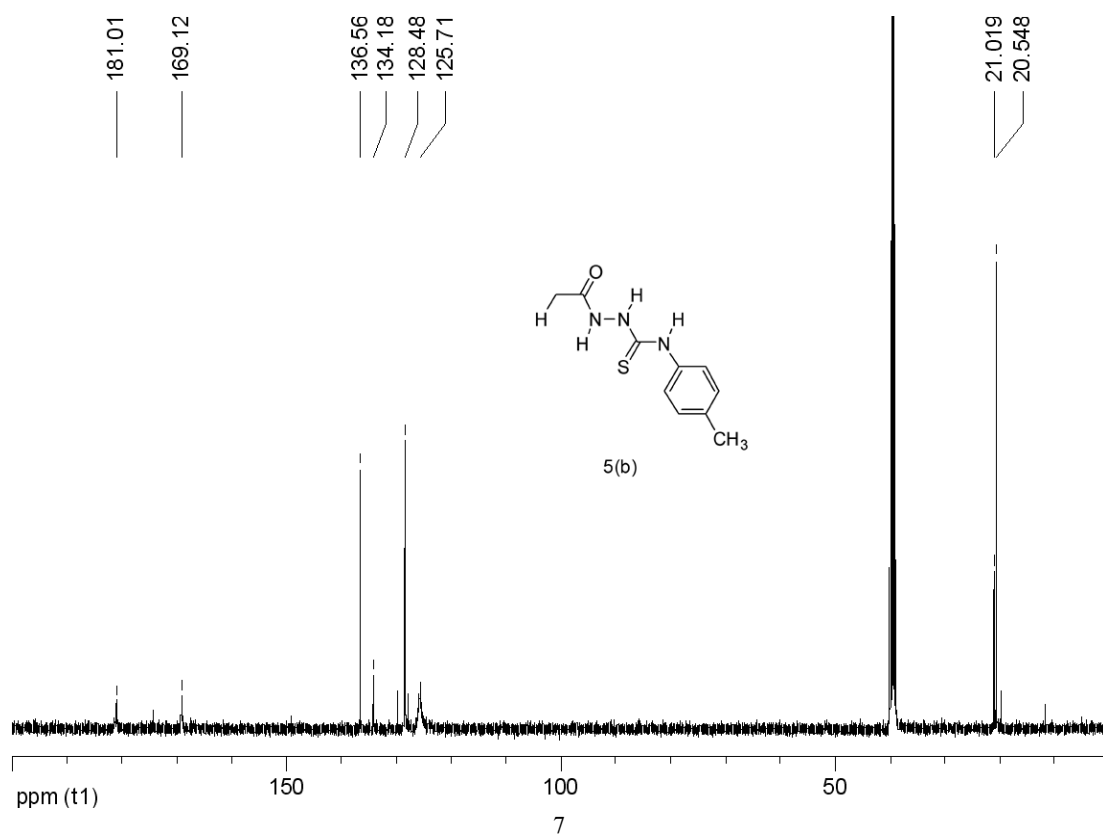

## 2-Acetyl-*N*-phenylhydrazinecarbothioamide (5c)

$^1\text{H}$  NMR (400 MHz,  $\text{DMSO-}d_6$ )

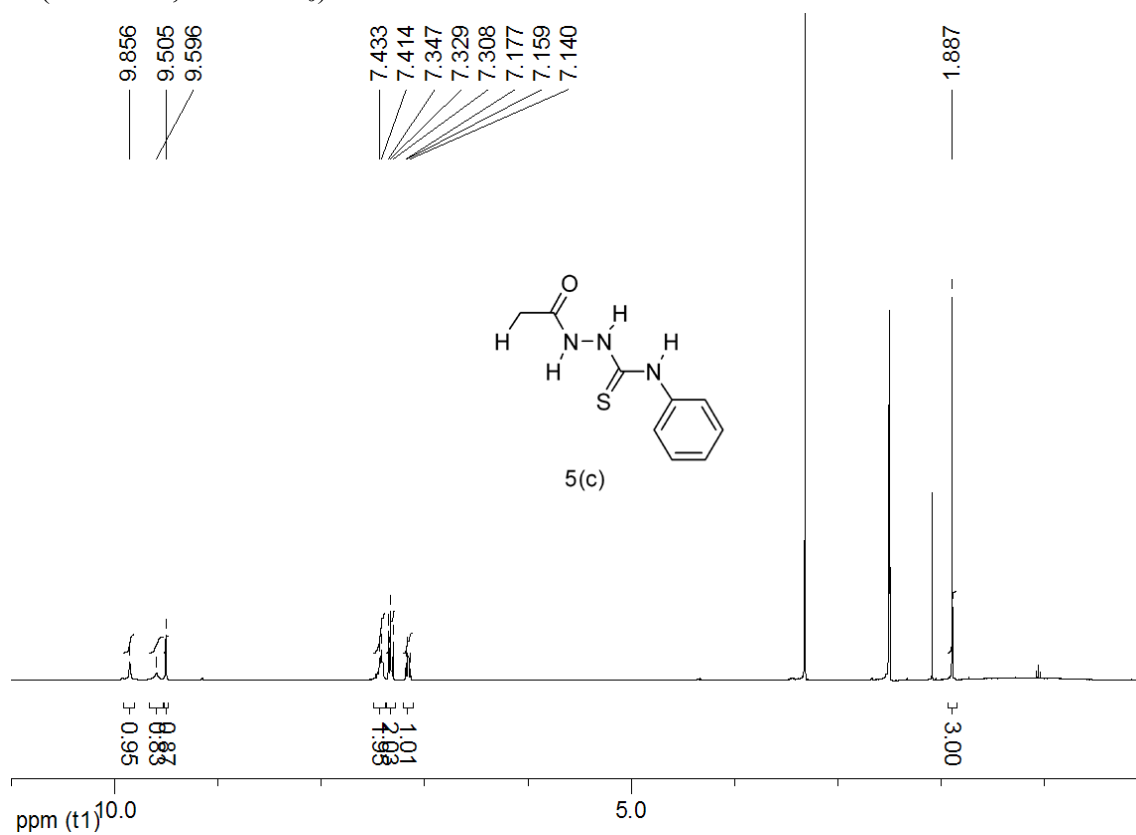

$^{13}\text{C}$  NMR (100 MHz,  $\text{DMSO-}d_6$ )

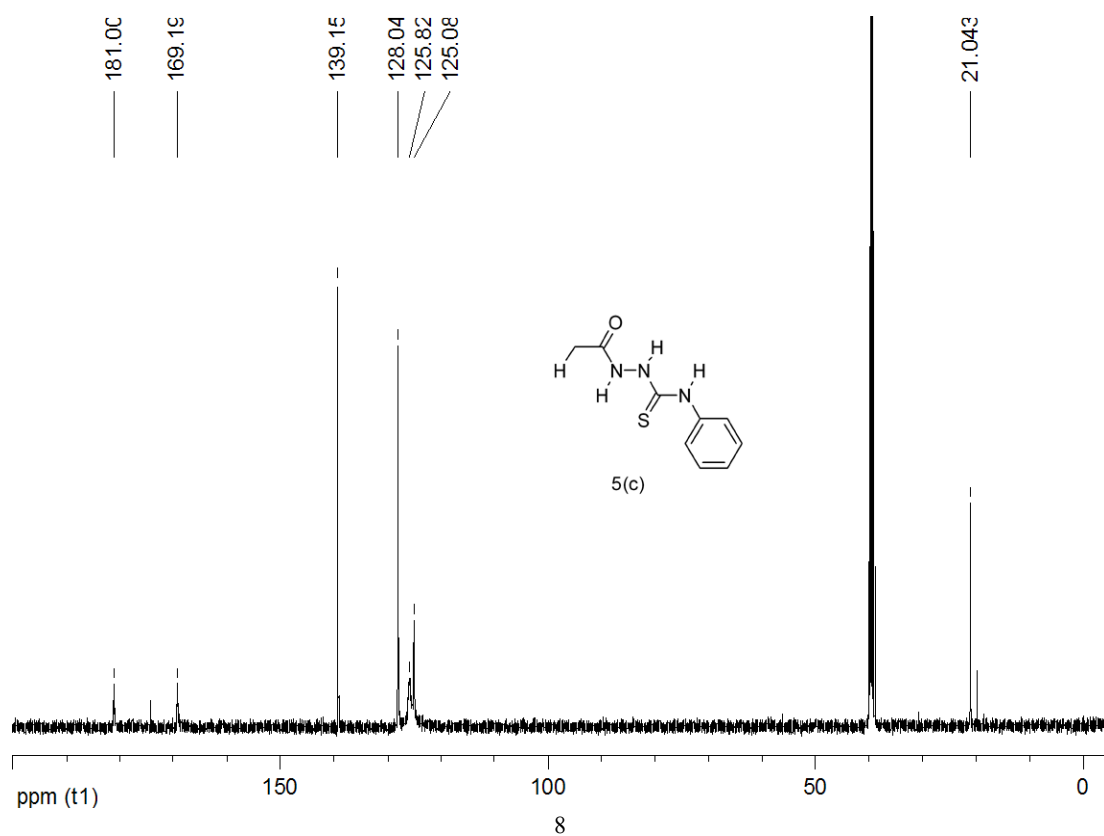



## 2-Acetyl-N-(3-bromophenyl)hydrazinecarbothioamide (5d)

$^1\text{H}$  NMR (400 MHz,  $\text{DMSO}-d_6$ )

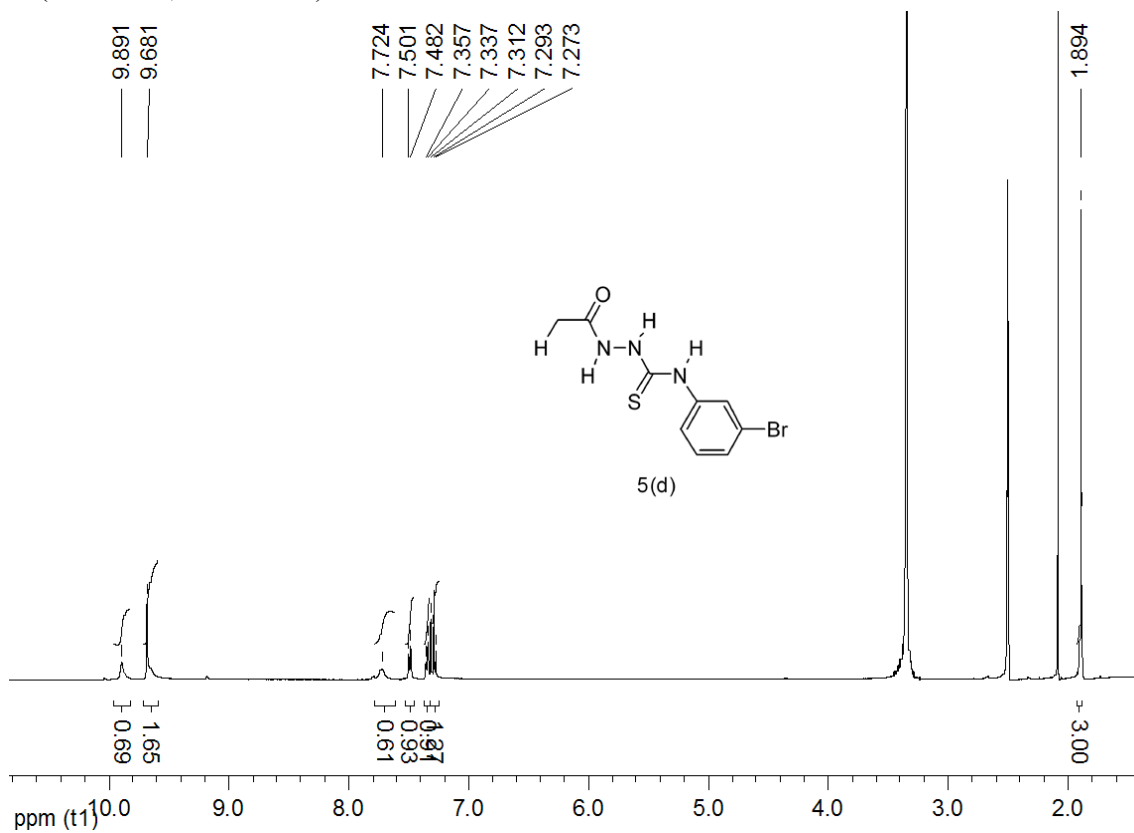

$^{13}\text{C}$  NMR (100 MHz,  $\text{DMSO}-d_6$ )

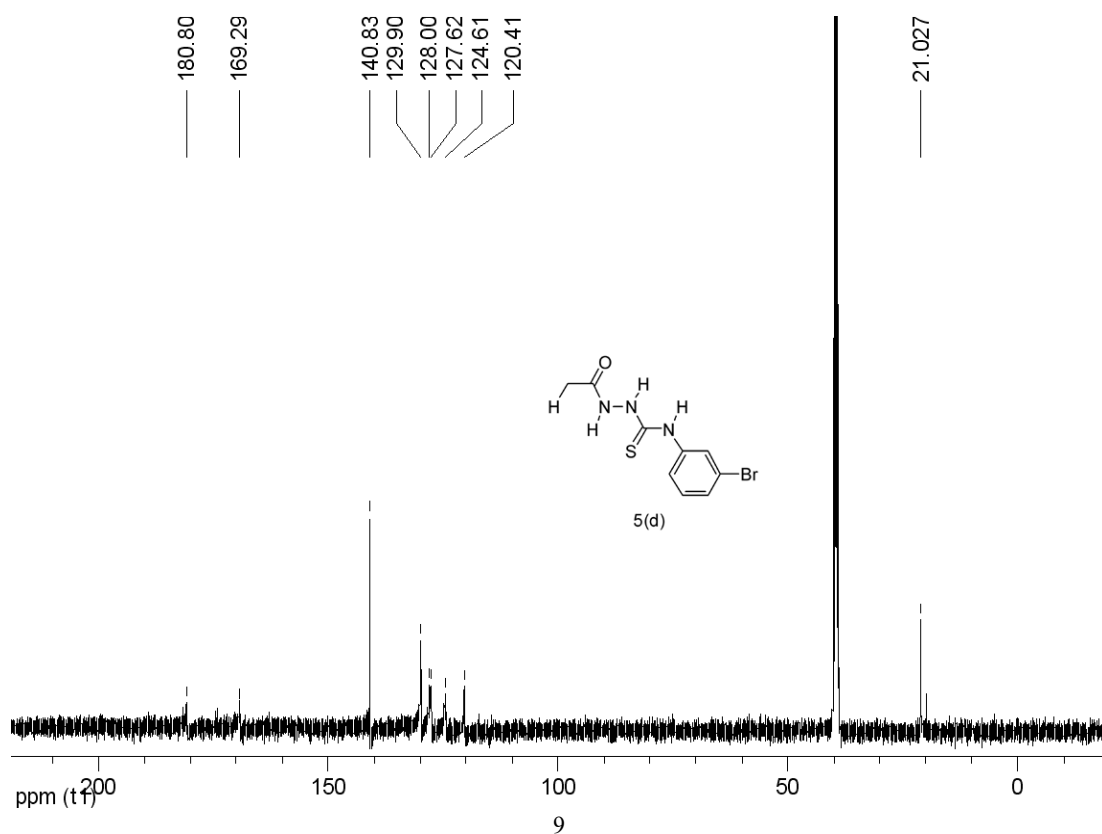

## 2-Acetyl-N-(3-(trifluoromethyl)phenyl)hydrazinecarbothioamide (5e)

$^1\text{H}$  NMR (400 MHz,  $\text{DMSO-}d_6$ )

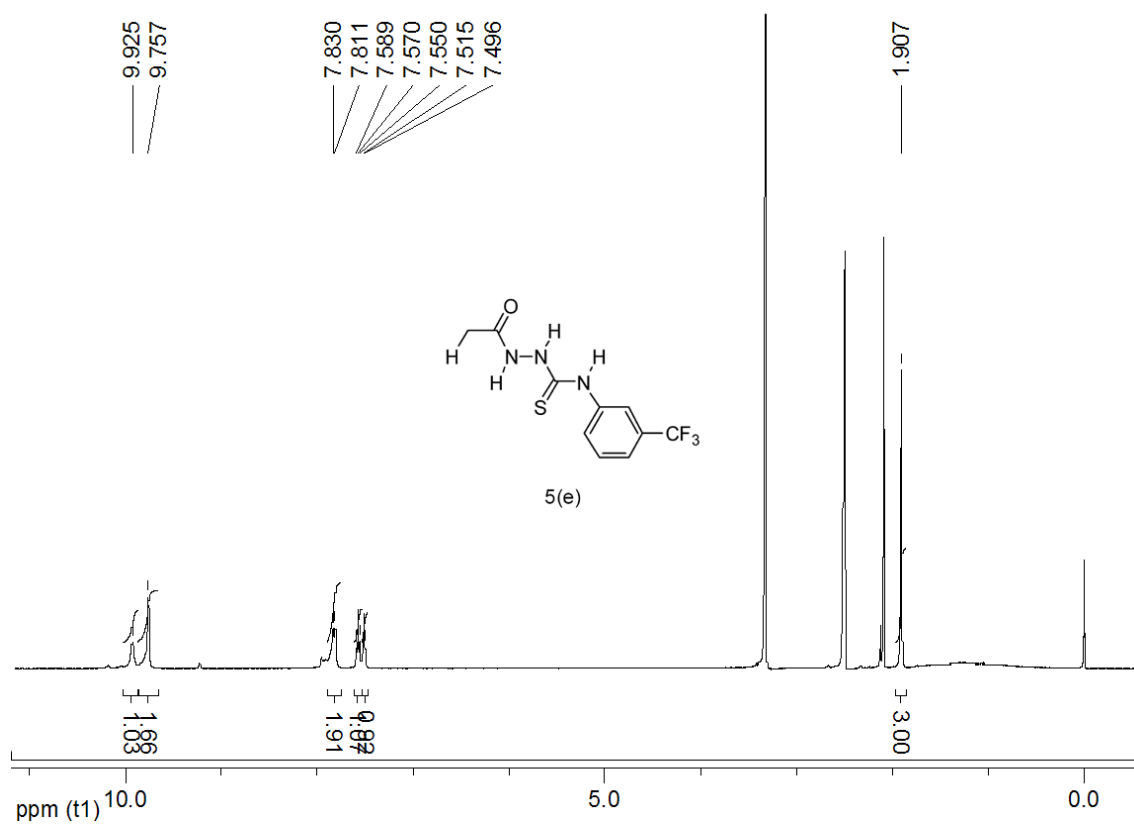

$^{13}\text{C}$  NMR (100 MHz,  $\text{DMSO-}d_6$ )

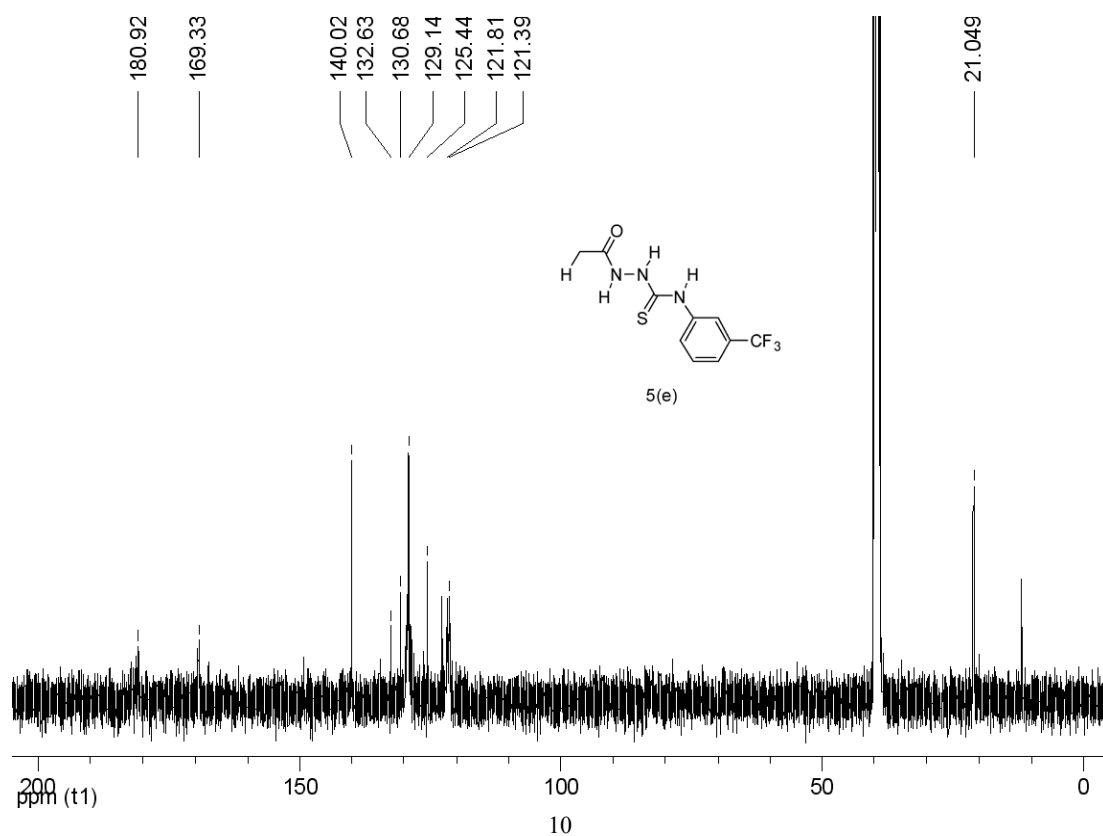

## 2-Acetyl-*N*-(4-nitrophenyl)hydrazinecarbothioamide (5f)

$^1\text{H}$  NMR (400 MHz,  $\text{DMSO-}d_6$ )

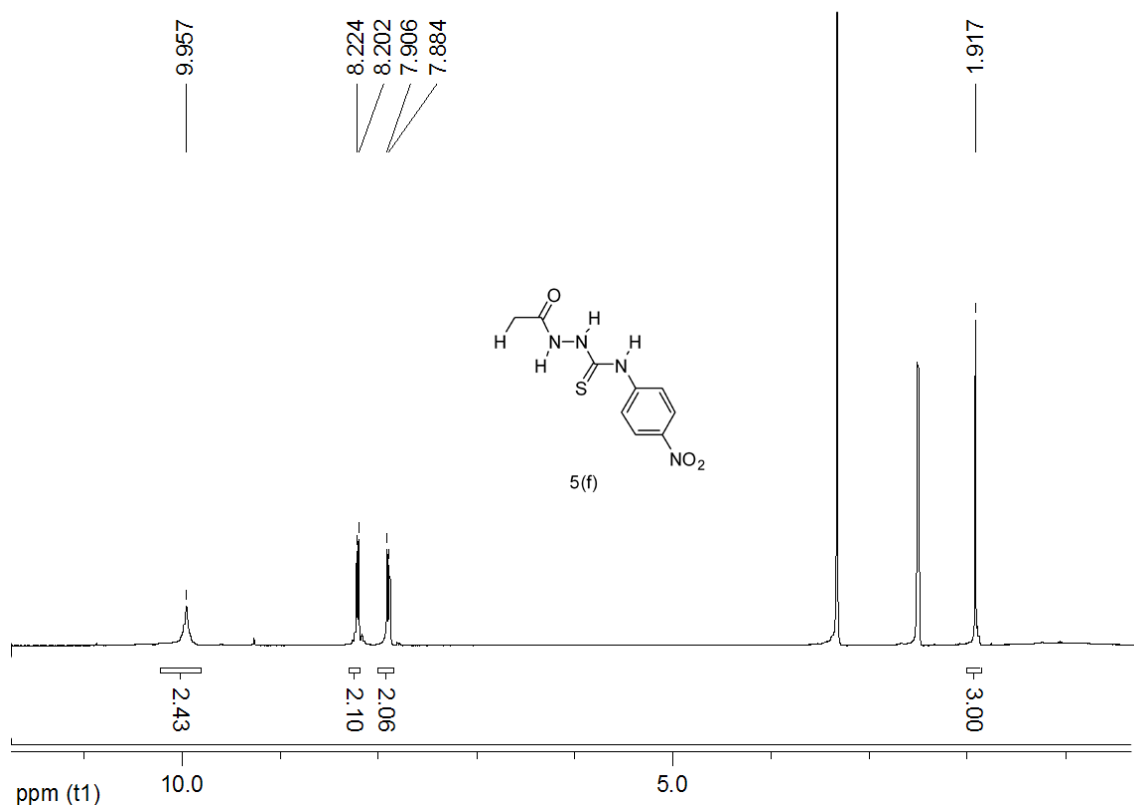

$^{13}\text{C}$  NMR (100 MHz,  $\text{DMSO-}d_6$ )

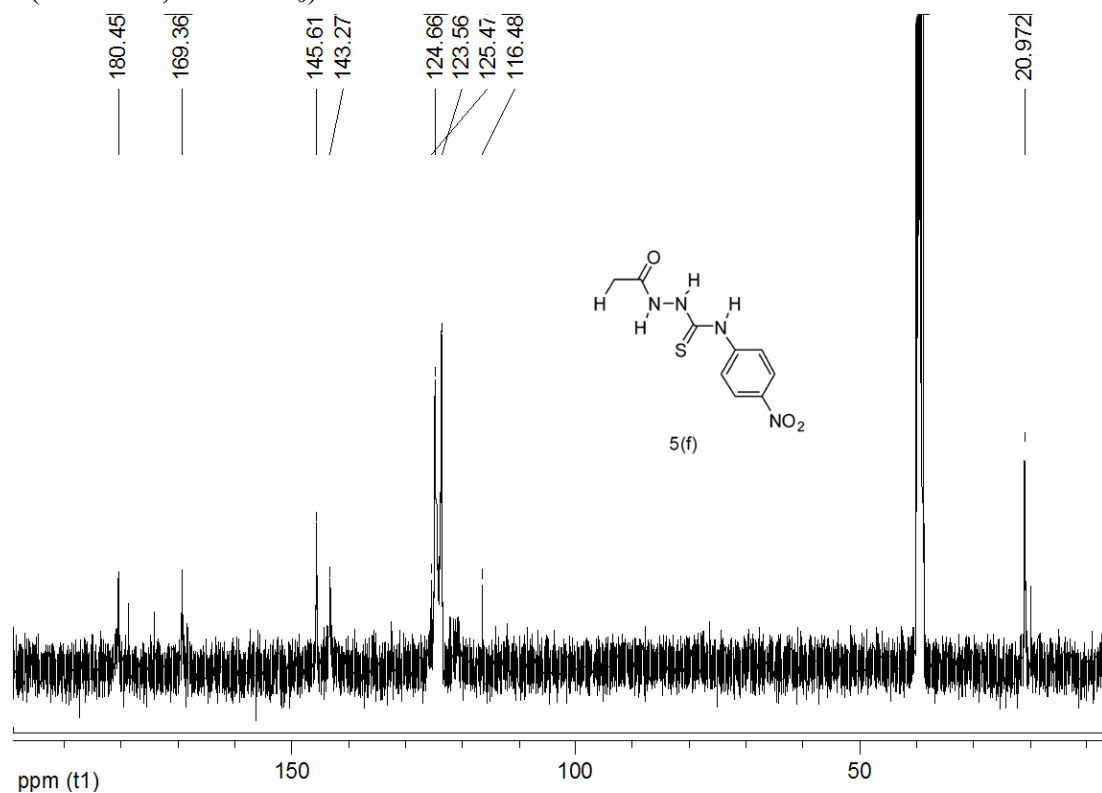

***tert*-Butyl 2-(2-(phenylcarbamothioyl)hydrazinecarbonyl)pyrrolidine-1-carboxylate (6)**

$^1\text{H}$  NMR (400 MHz,  $\text{DMSO-}d_6$ ). Several small peaks were noted in repeated experiments from differing samples, that were tentatively attributed to the minor enantiomer.

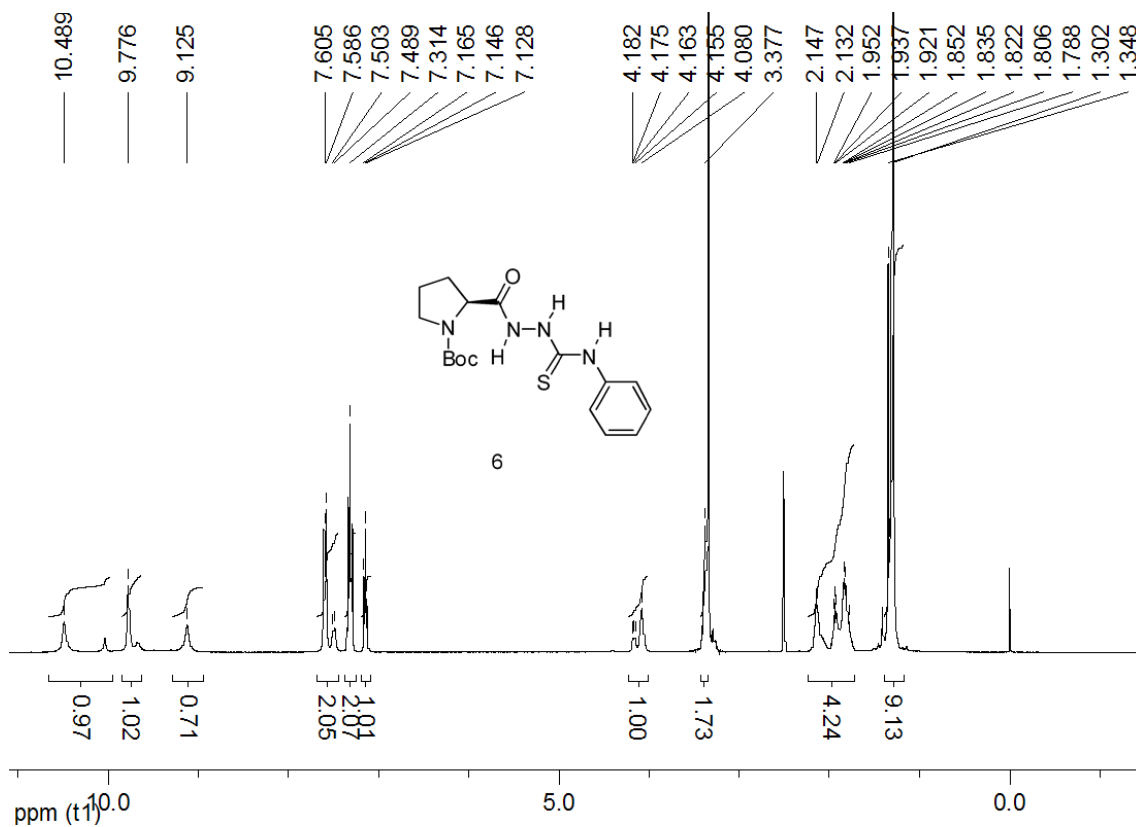

$^{13}\text{C}$  NMR (100 MHz,  $\text{DMSO-}d_6$ )

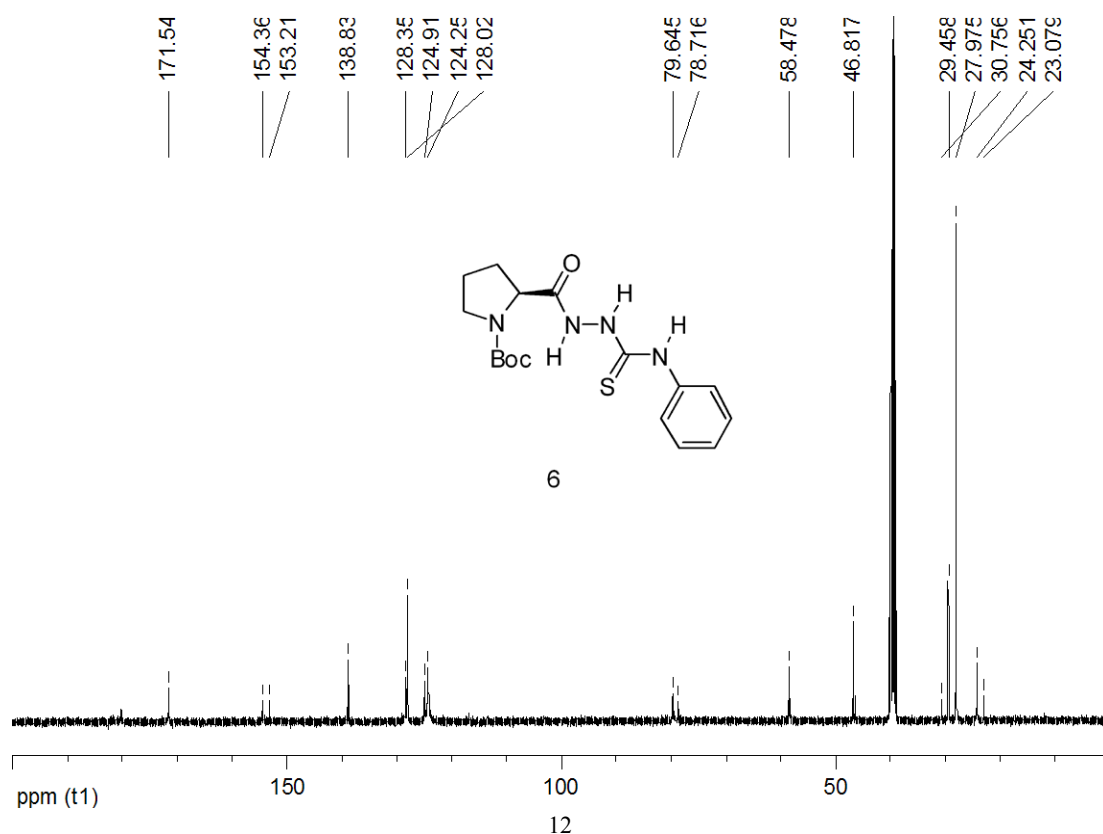

## 2-Acetyl-N-phenylhydrazinecarboxamide (7)

$^1\text{H}$  NMR (400 MHz,  $\text{DMSO-}d_6$ )

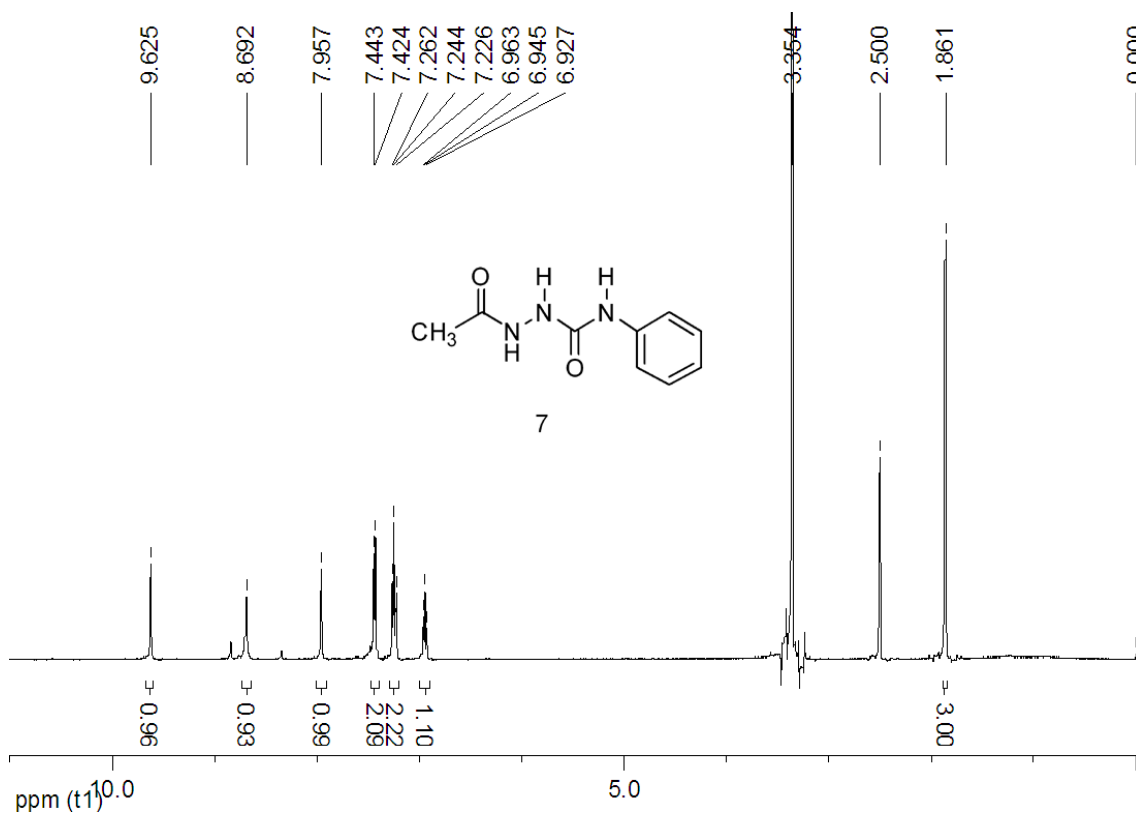

$^{13}\text{C}$  NMR (100 MHz,  $\text{DMSO-}d_6$ )

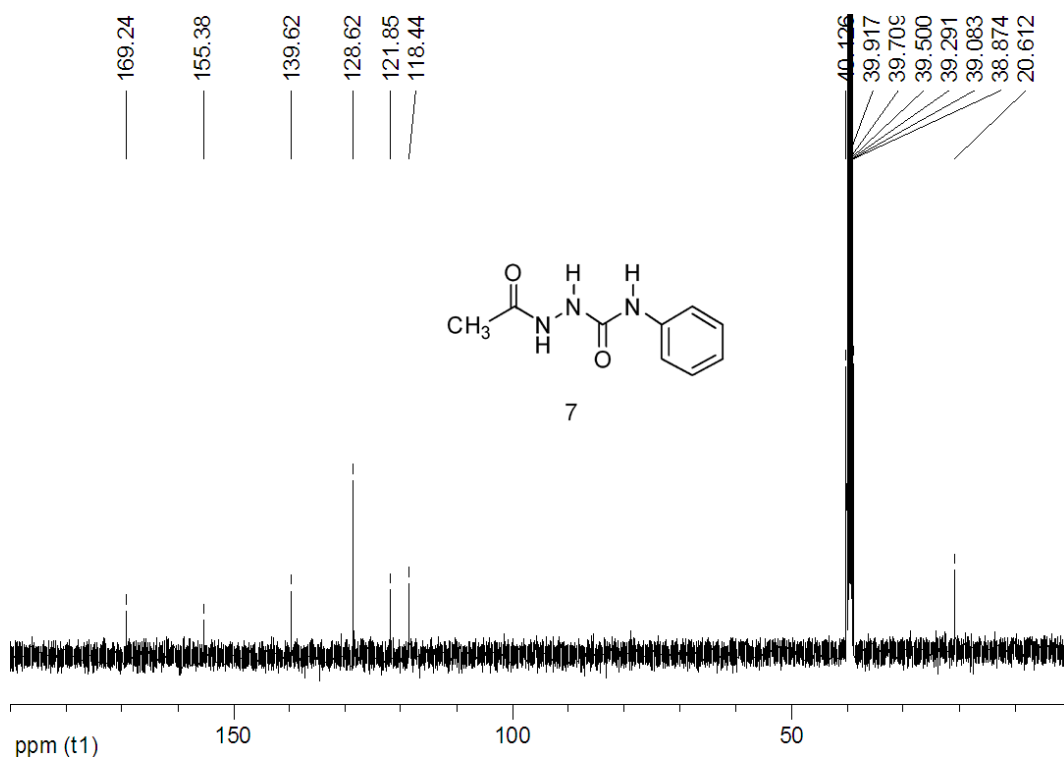

Supplement: b910255h.pdf [file b910255h.pdf]
